# Supplementary material for: Nanoscale-femtosecond dielectric response of Mott insulators captured by two-color near-field ultrafast electron microscopy
Source: Springer Nature journal article supplement (doi:10.1038/s41467-020-19636-6), 2020-11-13
Supplement: 41467_2020_19636_MOESM2_ESM.pdf [file 41467_2020_19636_MOESM2_ESM.pdf]

## **Description of Additional Supplementary Files**

**Supplementary Movie 1:** Temporal evolution of one-colour PINEM images of a single VO<sub>2</sub> NW with P1 optical pulse (duration of 50 fs,  $\lambda = 800$  nm, fluence of  $\sim 4.1$  mJ/cm<sup>2</sup>) polarized perpendicularly to the NW axis.
